# Supplementary material
Source: PubMed Central journal article supplement (PMC7371537)
Supplement: NIHMS1600616-supplement-1.pdf [file NIHMS1600616-supplement-1.pdf]

Supplemental Table 1. Trends in Prevalence of Self-Reported Past-Year Methamphetamine Use Among Those Not Reporting Past-Year Heroin Use in the United States, 2015-2018

|                               | Weighted % (95% CI) |               |               |                | % change from 2015 to 2018 |                 |                              |
|-------------------------------|---------------------|---------------|---------------|----------------|----------------------------|-----------------|------------------------------|
|                               | 2015                | 2016          | 2017          | 2018           | Absolute change            | Relative change | Linear trend <i>P</i> -value |
| Past-year methamphetamine use | 0.6 (0.5-0.7)       | 0.4 (0.4-0.5) | 0.5 (0.4-0.6) | 0.6 (0.5-0.7)  | 0.0                        | 6.7             | .196                         |
| <b>Past-Year Drug Use</b>     |                     |               |               |                |                            |                 |                              |
| Cannabis                      | 2.8 (2.4-3.3)       | 1.8 (1.5-2.2) | 2.4 (2.0-2.9) | 2.5 (2.1-3.1)  | -0.3                       | -10.9           | .013 <sup>a</sup>            |
| LSD                           | 4.3 (2.6-7.1)       | 4.7 (3.1-6.9) | 6.9 (4.8-9.8) | 8.1 (5.5-11.6) | 3.7                        | 86.6            | .019                         |
| Ecstasy                       | 5.2 (3.4-8.0)       | 4.5 (2.3-8.6) | 5.3 (3.6-7.8) | 7.7 (5.5-10.5) | 2.5                        | 47.7            | .201                         |
| Cocaine                       | 7.4 (6.0-9.1)       | 6.5 (4.5-9.3) | 7.3 (5.6-9.4) | 9.4 (7.1-12.5) | 2.0                        | 27.3            | .091                         |
| Prescription opioids          | 4.4 (3.4-5.5)       | 3.8 (3.0-4.7) | 4.2 (3.2-5.4) | 6.1 (4.4-8.4)  | 1.8                        | 41.1            | .046 <sup>b</sup>            |
| Prescription tranquilizers    | 7.1 (5.6-9.0)       | 5.4 (4.0-7.2) | 5.5 (4.1-7.3) | 8.3 (6.3-10.7) | 1.2                        | 16.3            | .012 <sup>b</sup>            |
| Prescription stimulants       | 6.0 (4.4-8.2)       | 4.8 (3.4-6.8) | 6.6 (5.0-8.6) | 4.2 (3.0-5.9)  | -1.8                       | -29.7           | .357                         |

Note. Misuse is defined by NSDUH as using a drug in any way not directed by a doctor, including use without a prescription, more often, in greater amounts, or longer than directed to use them, or use in any other way not directed to use. *P*-values for trends are for linear trends. We also tested quadratic and cubic trends. If a quadratic or cubic trend was present, then the *p*-value is for the that trend. <sup>a</sup> cubic trend, <sup>b</sup> quadratic trend

Supplemental Table 2. Trends in Prevalence of Self-Reported Use of Other Drugs in the United States, 2015-2018

|                                | Weighted % (95% CI) |                  |                  |                  | % change from 2015 to 2018 |                 | Linear trend <i>P</i> -value |
|--------------------------------|---------------------|------------------|------------------|------------------|----------------------------|-----------------|------------------------------|
|                                | 2015                | 2016             | 2017             | 2018             | Absolute change            | Relative change |                              |
| <b>Past-Year LSD Users</b>     |                     |                  |                  |                  |                            |                 |                              |
| Ecstasy                        | 52.3 (47.4-57.0)    | 40.4 (35.0-46.0) | 38.0 (33.0-43.3) | 38.0 (33.2-43.1) | -14.3                      | -27.3           | .002 <sup>a</sup>            |
| Cocaine                        | 39.3 (34.4-44.5)    | 36.9 (31.3-42.9) | 42.6 (37.1-48.3) | 42.9 (38.1-47.8) | 3.6                        | 9.2             | .118                         |
| Heroin                         | 5.7 (3.5-9.1)       | 5.4 (3.5-8.3)    | 5.9 (3.7-9.2)    | 3.9 (2.2-6.7)    | -1.8                       | -32.0           | .300                         |
| Prescription opioids           | 36.3 (31.4-41.5)    | 30.3 (25.7-35.3) | 31.8 (27.2-36.7) | 21.3 (18.2-24.8) | -15.0                      | -41.3           | <.001                        |
| <b>Past-Year Cocaine Users</b> |                     |                  |                  |                  |                            |                 |                              |
| LSD                            | 12.8 (11.1-14.8)    | 13.9 (11.8-16.3) | 15.8 (13.5-18.4) | 17.9 (14.9-21.4) | 5.1                        | 39.8            | .004                         |
| Ecstasy                        | 26.0 (22.1-30.4)    | 23.6 (19.9-27.8) | 22.4 (19.8-25.2) | 23.0 (19.7-26.8) | -3.0                       | -11.5           | .254                         |
| Heroin                         | 8.9 (7.1-11.3)      | 10.4 (8.5-12.7)  | 8.1 (6.2-10.5)   | 8.8 (6.3-12.1)   | -0.2                       | -1.8            | .601                         |
| Prescription opioids           | 35.5 (32.0-39.1)    | 32.9 (29.8-36.1) | 27.9 (24.7-31.3) | 26.2 (22.9-29.8) | -9.3                       | -26.2           | <.001                        |
| <b>Past-Year Ecstasy Users</b> |                     |                  |                  |                  |                            |                 |                              |
| LSD                            | 31.4 (28.0-35.1)    | 31.2 (27.4-35.4) | 33.9 (29.3-38.9) | 36.0 (30.9-41.4) | 4.6                        | 14.6            | .104                         |
| Cocaine                        | 48.0 (42.6-53.4)    | 48.7 (43.8-53.6) | 53.8 (48.4-59.2) | 52.2 (47.0-57.4) | 4.2                        | 8.8             | .100                         |
| Heroin                         | 4.5 (3.0-6.9)       | 4.5 (3.1-6.5)    | 5.0 (2.9-8.5)    | 5.5 (3.2-9.2)    | 0.9                        | 20.7            | .519                         |
| Prescription opioids           | 35.0 (29.9-40.4)    | 30.6 (25.4-36.3) | 32.4 (27.8-37.3) | 26.0 (22.0-30.5) | -9.0                       | -25.7           | .027                         |
| <b>Past-Year Heroin Users</b>  |                     |                  |                  |                  |                            |                 |                              |
| LSD                            | 10.7 (6.7-16.6)     | 10.9 (6.9-16.9)  | 14.1 (8.6-22.3)  | 10.5 (5.9-18.0)  | -0.2                       | -1.9            | .815                         |
| Ecstasy                        | 14.2 (9.2-21.3)     | 11.8 (8.1-17.0)  | 13.6 (7.7-22.9)  | 15.7 (9.3-25.4)  | 1.5                        | 10.6            | .669                         |
| Cocaine                        | 51.3 (42.1-60.4)    | 56.5 (48.2-64.4) | 52.5 (42.7-62.2) | 57.0 (44.7-68.5) | 5.7                        | 11.1            | .596                         |
| Prescription opioids           | 73.6 (64.7-81.0)    | 67.2 (58.0-75.3) | 63.0 (53.7-71.4) | 61.6 (50.8-71.4) | -12.0                      | -16.3           | .054                         |
| <b>Past-Year Opioid Users</b>  |                     |                  |                  |                  |                            |                 |                              |
| LSD                            | 4.6 (3.9-5.4)       | 5.0 (4.1-6.0)    | 6.5 (5.4-7.8)    | 4.9 (4.1-5.9)    | 0.3                        | 7.0             | .200                         |
| Ecstasy                        | 7.4 (6.0-9.1)       | 6.5 (5.4-7.9)    | 7.4 (6.2-8.8)    | 6.4 (5.3-7.6)    | -1.0                       | -13.8           | .538                         |

|         |                      |                      |                      |                      |     |     |      |
|---------|----------------------|----------------------|----------------------|----------------------|-----|-----|------|
| Cocaine | 13.8 (12.0-<br>15.8) | 14.4 (12.9-<br>16.2) | 15.3 (13.9-<br>16.9) | 14.5 (12.5-<br>16.7) | 0.7 | 5.1 | .390 |
| Heroin  | 5.0 (4.0-<br>6.2)    | 5.5 (4.5-<br>6.6)    | 5.3 (4.4-<br>6.5)    | 5.2 (4.2-<br>6.6)    | 0.3 | 5.4 | .749 |

Note. Misuse is defined by NSDUH as using a drug in any way not directed by a doctor, including use without a prescription, more often, in greater amounts, or longer than directed to use them, or use in any other way not directed to use. *P*-values for trends are for linear trends. We also tested quadratic and cubic trends. If a quadratic or cubic trend was present, then the *p*-value is for the that trend. <sup>a</sup> quadratic trend

Journal Pre-proof
